# Supplementary material for: Enhancing the EMI shielding of natural rubber-based supercritical CO2foams by exploiting their porous morphology and CNT segregated networks
Source: Royal Society of Chemistry journal article supplement (doi:10.1039/c8nr07351a), 2018-12-04
Supplement: c8nr07351a1.pdf [file c8nr07351a1.pdf]

Supplementary Information

**Enhancing EMI shielding of natural rubber-based supercritical CO<sub>2</sub>  
foams by exploiting porous morphology and CNT segregated  
network**

Yanhu Zhan,<sup>a,b</sup> Maria Oliviero,<sup>a</sup> Jian Wang,<sup>c</sup> Andrea Sorrentino,<sup>a</sup>

Giovanna G. Buonocore,<sup>a</sup> Luigi Sorrentino,<sup>a</sup> Marino Lavorgna,<sup>\*a</sup>

Hesheng Xia<sup>c</sup> and Salvatore Iannace<sup>d</sup>

a. Institute of Polymers, Composites and Biomaterials, National Research Council, P.le Fermi, 1-80055 Portici, NA, Italy. E-mail address: mlavorgn@unina.it

b. School of Materials Science and Engineering, Liaocheng University, Liaocheng 252000, China

c. State Key Laboratory of Polymer Materials Engineering, Polymer Research Institute, Sichuan University, Chengdu 610065, China

d. Institute for Macromolecular Studies (ISMAC-CNR) National Research Council, Milano 20133, Italy.

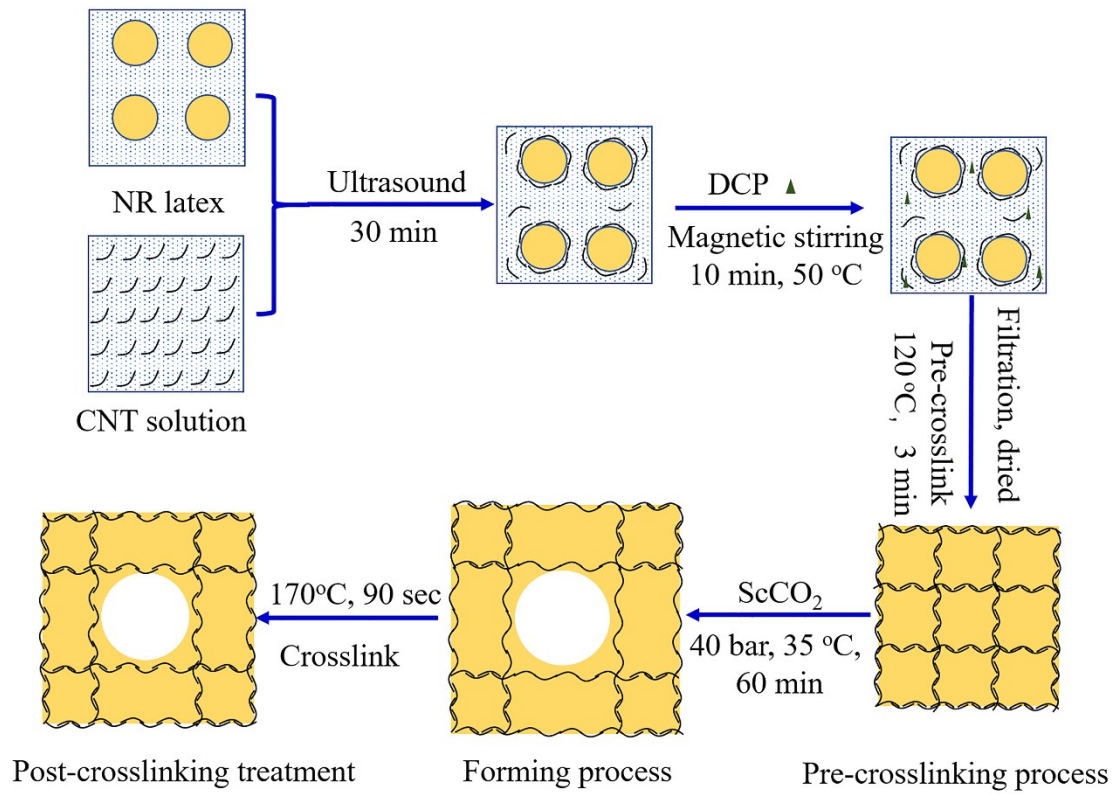

Fig. S1. The preparation of F-NR/CNTs foams by multi-steps method

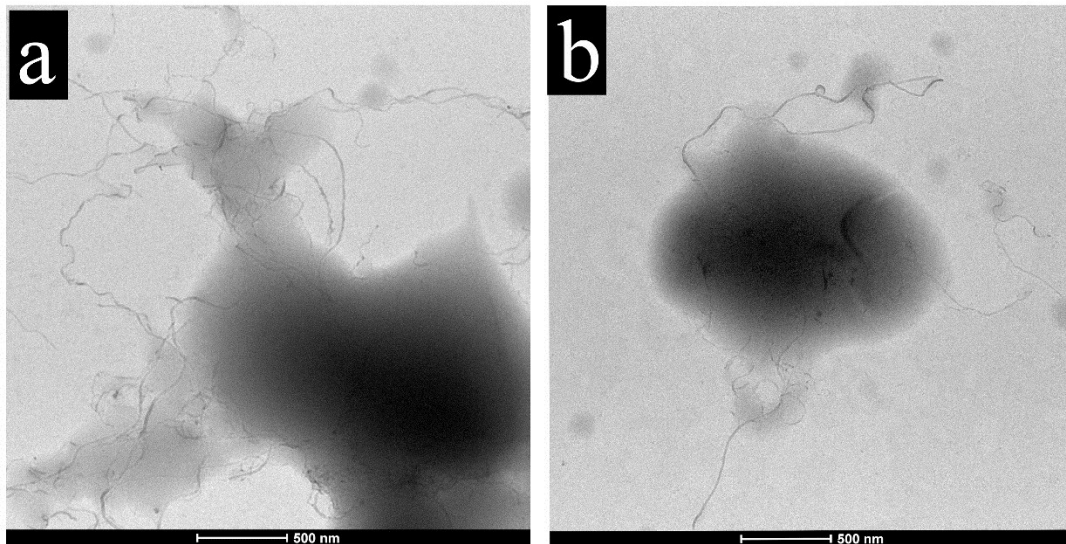

Fig. S2. TEM images of NR latex particles coated with 3.31wt% CNTs

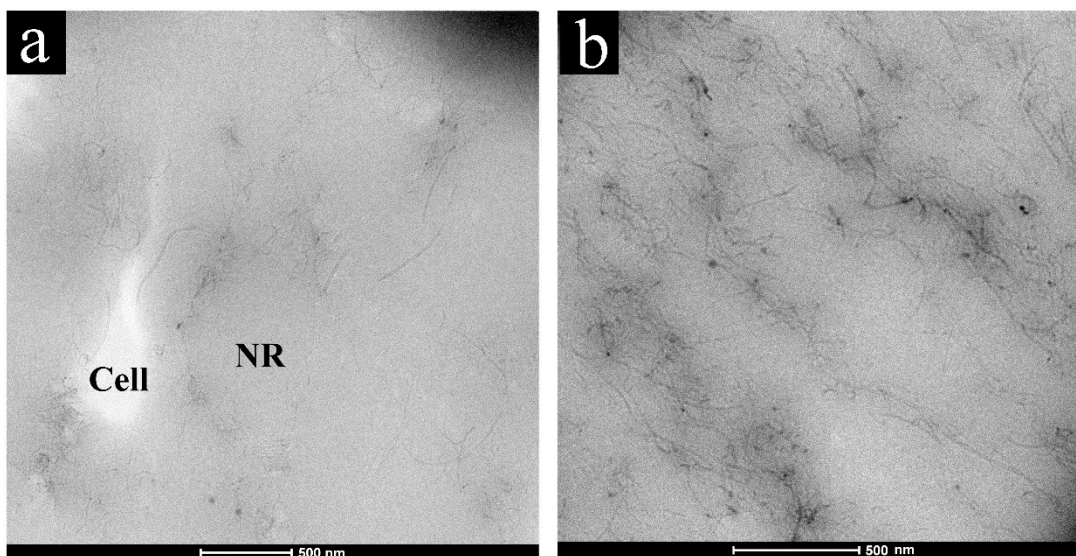

Fig. S3. TEM images of F-NR/CNT<sub>1.68</sub> (a) and F-NR/CNT<sub>6.40</sub> (b)

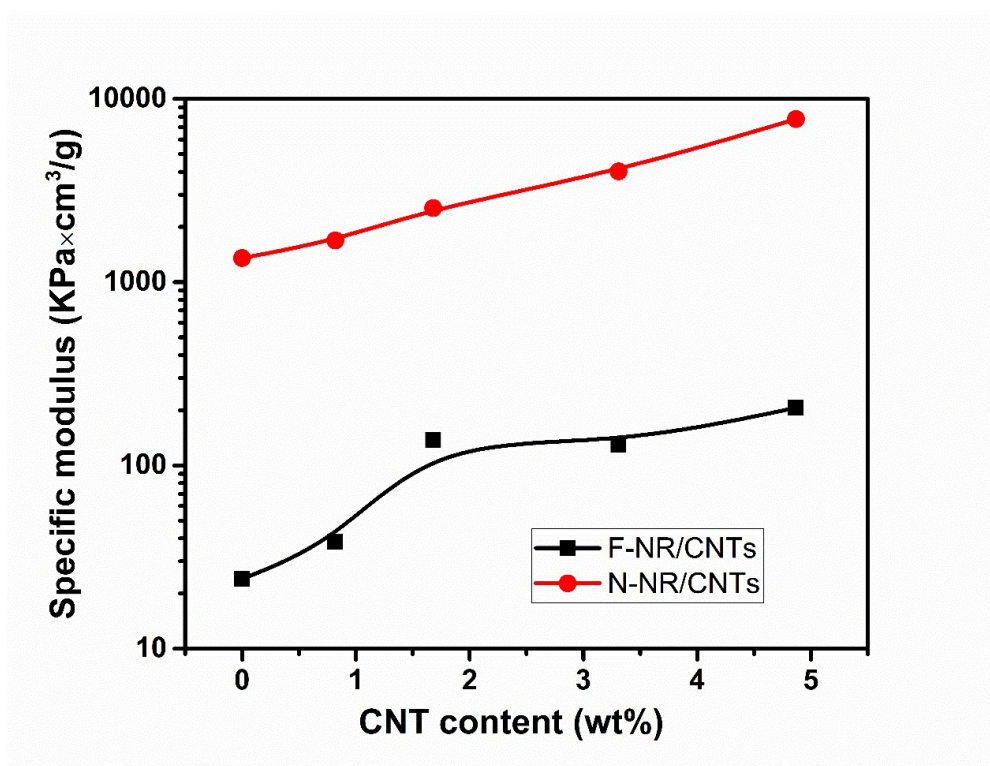

Fig. S4. Specific modulus of N-NR/CNTs and F-NR/CNTs composites



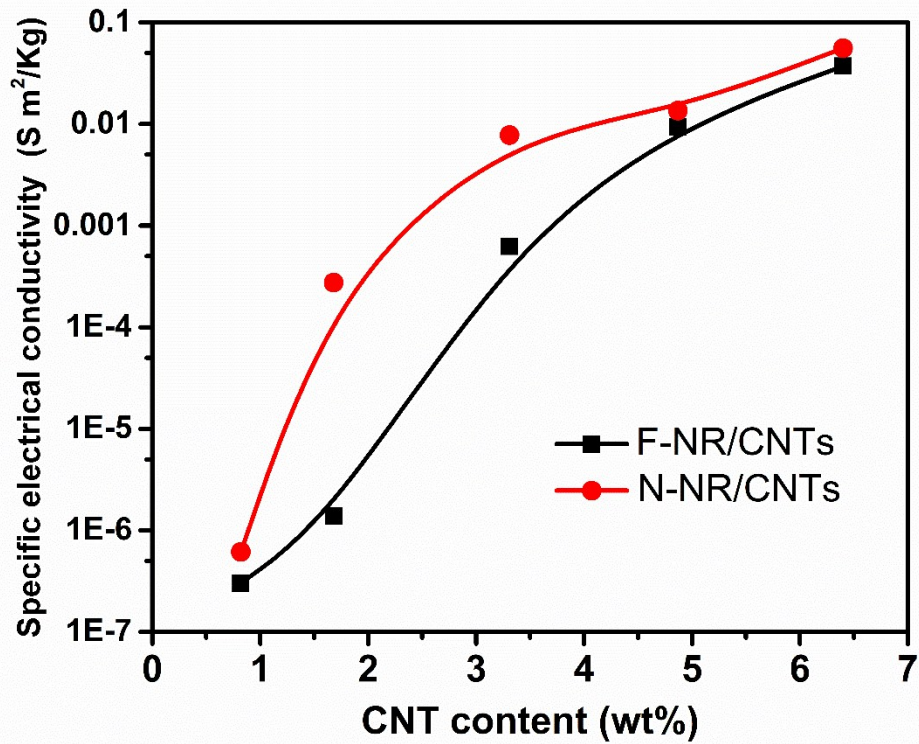

Fig. S5. Specific electrical conductivity of N-NR/CNTs and F-NR/CNTs composites

Table S1: Mechanical properties of F-NR/CNTs composite foams

| Sample                   | Stress (KPa) |       |        | Slope (KPa) |            |
|--------------------------|--------------|-------|--------|-------------|------------|
|                          | 10%          | 20%   | 30%    | 10~20%      | 32.5~42.5% |
| NR foam                  | 2.64         | 6.80  | 16.09  | 41.5        | 205        |
| F-NR/CNT <sub>0.82</sub> | 3.40         | 10.94 | 22.79  | 75.9        | 199        |
| F-NR/CNT <sub>1.68</sub> | 12.90        | 39.75 | 80.06  | 269         | -          |
| F-NR/CNT <sub>3.31</sub> | 21.07        | 65.45 | 110.42 | 450         | 658        |
| F-NR/CNT <sub>4.87</sub> | 29.83        | 77.46 | 144.50 | 486         | 1048       |

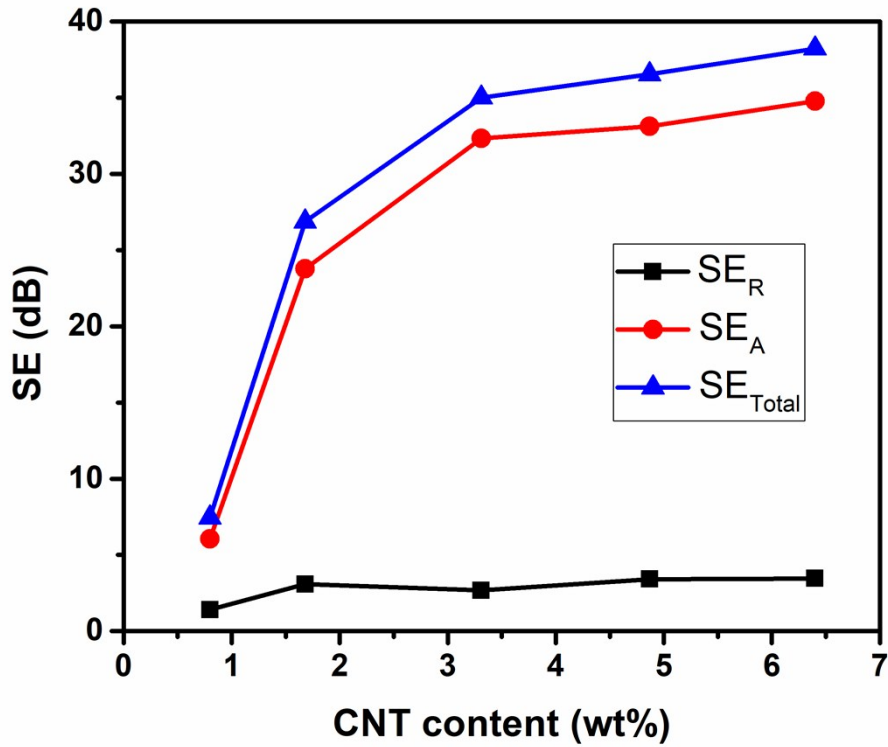

Fig.S6 Shielding by reflection, absorption, and total shielding of N-NR/CNTs composite at the frequency of 10.3 GHz

Fig. S6 shows  $SE_A$ ,  $SE_R$  and  $SE_{Total}$  of N-NR/CNT composites. The values of  $SE_{Total}$  and  $SE_A$  noticeably increase with the CNTs content, while  $SE_R$  changes only slightly over the investigated CNT content range. This confirms that absorption of electromagnetic waves plays a major role to EMI SE of N-NR/CNT rather than reflection mechanism.
